# Supplementary material for: Biomimetic Polydopamine-Modified Silk Fibroin/Curcumin Nanofibrous Scaffolds for Chemo-photothermal Therapy of Bone Tumor
Source: PubMed Central journal article supplement — ACS Omega. 2021 Aug 21;6(34):22213–23. doi: 10.1021/acsomega.1c02903 (PMC8412900; doi:10.1021/acsomega.1c02903), 2021-08-21
Supplement: ao1c02903_si_001.pdf [file ao1c02903_si_001.pdf]

# Supporting Information

## **Biomimetic polydopamine modified silk/curcumin nanofibrous scaffolds for chemo-photothermal therapy of bone tumor**

Zhiyuan Meng,<sup>a</sup> Yichao Liu,<sup>b</sup> Kexiang Xu,<sup>a</sup> Xing Sun,<sup>a</sup> Qingwen Yu,<sup>a</sup> Zhongqing Wu,<sup>a</sup> and Zheng Zhao<sup>\*a</sup>

a. State Key Laboratory of Advanced Technology for Materials Synthesis and Processing, Wuhan University of Technology, Wuhan 430070, PR China.

b. Center for Evidence-Based and Translational Medicine, Zhongnan Hospital of Wuhan University.

### **\* Corresponding author:**

Prof. Zheng Zhao

Tel: +86-27-87651853, E-mail: zhengzhao@whut.edu.cn

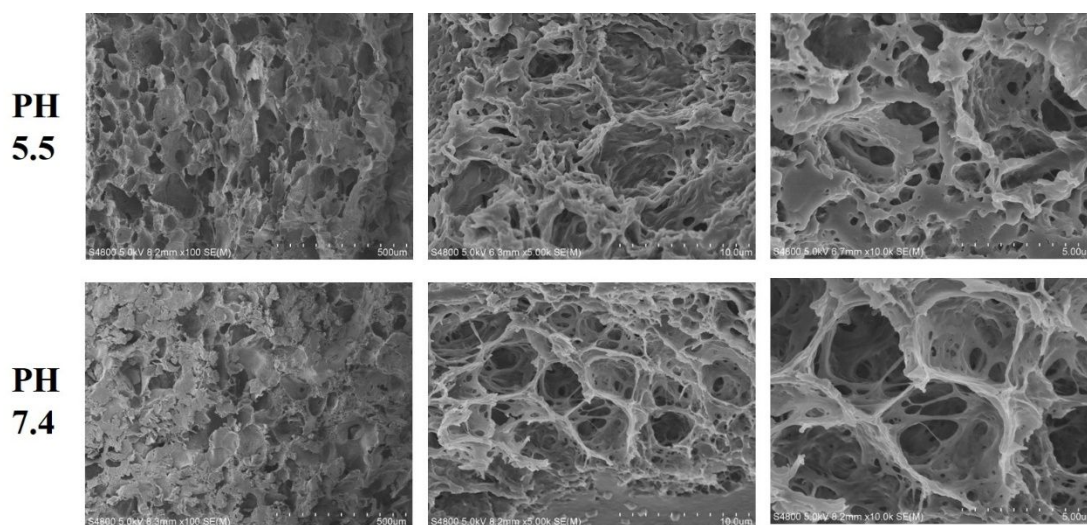

**Figure S1.** The SEM images of SF/CM-PDA scaffolds after 15 days of drug release in different pH.

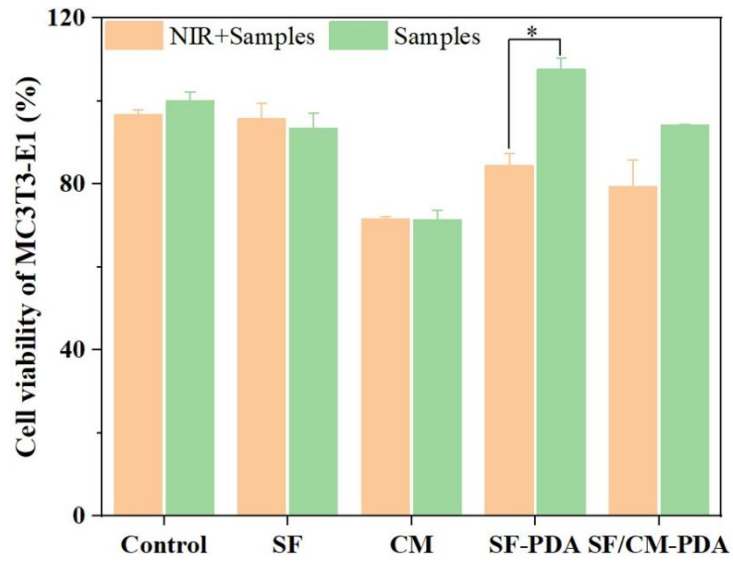

**Figure S2.** The cell viability of MG-63 cells after being incubated with the SF, SF-PDA, SF/CM-PDA scaffolds, and CM at the same CM concentration level with or without the treatment of NIR laser (808 nm, 1.3 W/cm<sup>2</sup>, 6 min).
